# Supplementary figures and images for: Bacterial Swarms Recruit Cargo Bacteria To Pave the Way in Toxic Environments
Source: PubMed Central journal article supplement — mBio. 2015 May 12;6(3):e00074-15. doi: 10.1128/mBio.00074-15 (PMC4436059; doi:10.1128/mbio.00074-15), 2015-05-12

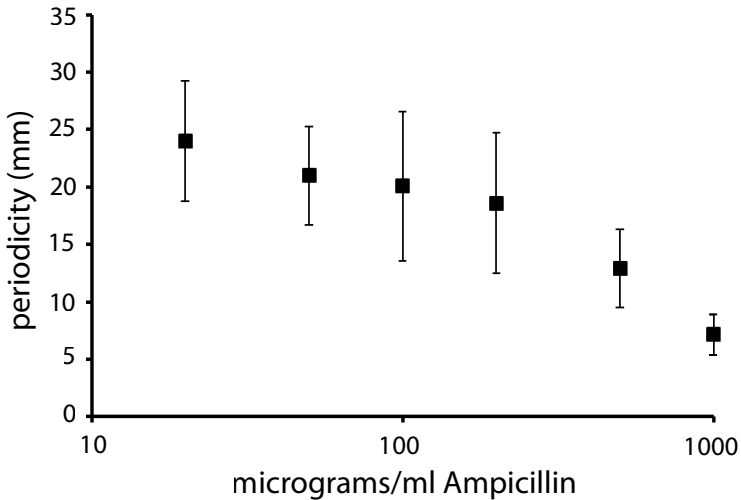

Supplement: mbo003152320sf1.pdf [file mbo003152320sf1.pdf]

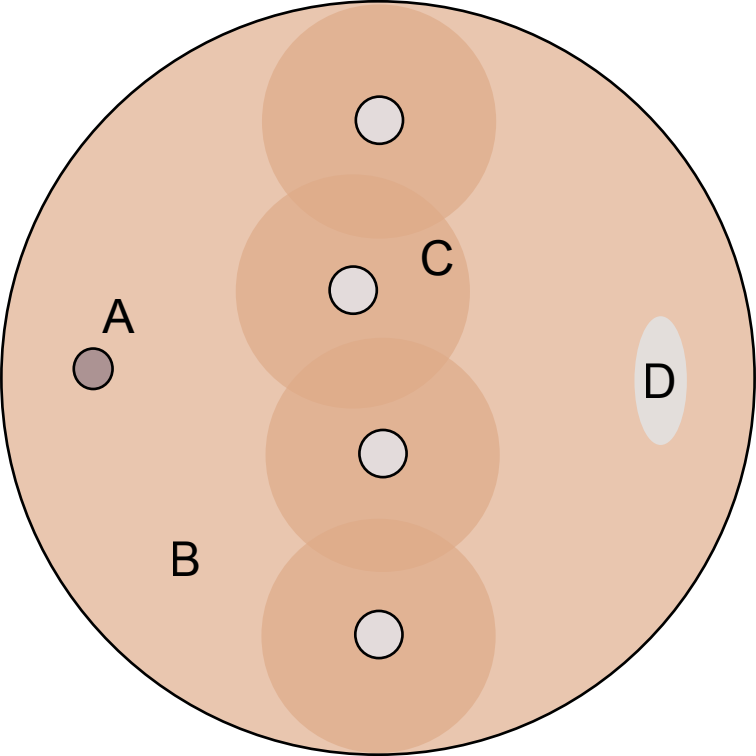

A

B

C

D

Supplement: mbo003152320sf3.pdf [file mbo003152320sf3.pdf]
